# Supplementary material for: Biphasic Effects of FGF2 on Adipogenesis
Source: PubMed Central journal article supplement (PMC4366188; doi:10.1371/journal.pone.0120073), 2015-03-19

S1\_Fig

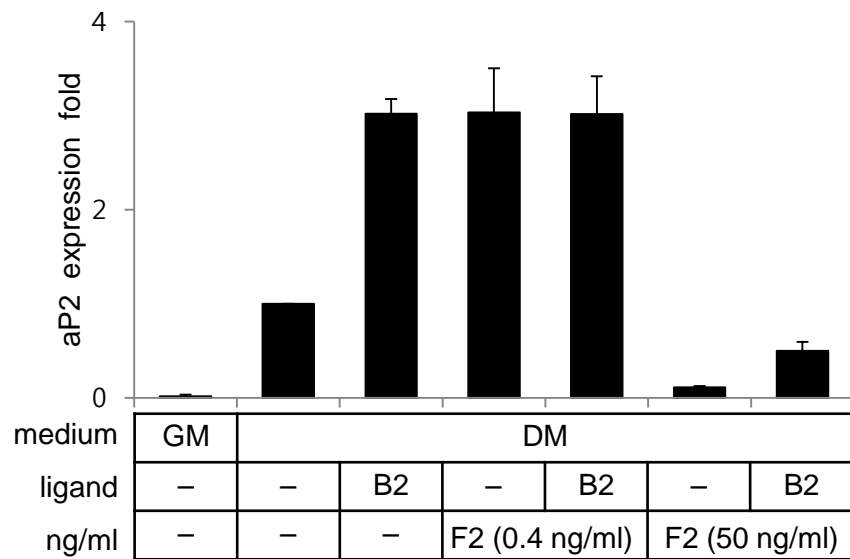

Supplement: pone.0120073.s001.pdf [file pone.0120073.s001.pdf]
